# Supplementary material for: Efficacy Studies of a Trivalent Vaccine Containing PCV-2a, PCV-2b Genotypes and Mycoplasma hyopneumoniae When Administered at 3 Days of Age and 3 Weeks Later against Porcine Circovirus 2 (PCV-2) Infection
Source: MDPI journal article supplement (doi:10.3390/vaccines10081234), 2022-08-01
Supplement: s1 [file s1]

## Supplementary Materials

**Table S1.** Number of animals enrolled per each action and timepoint performed in clinical studies.

| Weeks of age of study animals | Action performed | Num. of animals |                     |                 |                     |
|-------------------------------|------------------|-----------------|---------------------|-----------------|---------------------|
|                               |                  | Field trial A   |                     | Field trial B   |                     |
|                               |                  | Vaccinated pigs | Non-vaccinated pigs | Vaccinated pigs | Non-vaccinated pigs |
| <1                            | Body weight**    | 399             | 400                 | 337             | 360                 |
|                               | Blood sampling   | 47              | 50                  | 43              | 48                  |
| 7                             | Faecal swabs     | 42              | 44                  | 30              | 31                  |
|                               | Blood sampling   | 42              | 44                  | 30              | 31                  |
| 11                            | Faecal swabs     | 43*             | 43                  | 42              | 46                  |
|                               | Blood sampling   | 44              | 43                  | 42              | 46                  |
| 16                            | Body weight**    | 325             | 323                 | 378             | 389                 |
|                               | Faecal swabs     | 44              | 41                  | 40              | 42                  |
|                               | Blood sampling   | 44              | 41                  | 40              | 42                  |
| 20                            | Faecal swabs     | 42              | 39                  | 41              | 37                  |
|                               | Blood sampling   | 42              | 39                  | 41              | 37                  |
| 24-27                         | Body weight**    | 395             | 404                 | 417             | 404                 |
|                               | Faecal swabs     | 39              | 40                  | 48              | 53                  |
|                               | Blood sampling   | 39              | 40                  | 48              | 53                  |

\*One missing faecal swab

\*\* The number of animals weighed was not the same at each timepoint due to deviations occurring during the study (death animals or animals not found at the weighing moment)
